# Supplementary material for: EBF1, MYO6 and CALR expression levels predict therapeutic response in diffuse large B-cell lymphomas
Source: Frontiers journal article supplement (doi:10.3389/fimmu.2023.1266265), 2023-11-14
Supplement: Data_Sheet_1.PDF [file Data_Sheet_1.PDF]

## *Supplementary Material*

### **EBF1, MYO6 and CALR expression levels predict survival in diffuse large B-cell lymphomas**

#### **Supplementary Figure S1. DLBCL patient poor prognosis correlated to high LDH levels.**

**(A, B)** LDH high and low stratification in responder (A) and in non-responder (B) DLBCL patients, based on LDH mean level expression.

#### **Supplementary Figure S2. EBF1, MYO6 and CALR expression in positive and negative controls.**

**(A)** EBF1, MYO6 and CALR immunohistochemical analysis on lymph node, prostate cancer, and placenta, respectively. Isotype-specific immunoglobulins were used as negative control. Scale bar is 100  $\mu$ m. **(B)** Table showing the number of responder and non-responder DLBCL patients characterized by EBF1<sup>high</sup>/MYO6<sup>high</sup>/CALR<sup>low</sup> and EBF1<sup>low</sup>/MYO6<sup>low</sup>/CALR<sup>high</sup>.

#### **Supplementary Figure S3. EBF1, MYO6 and CALR are involved in pathways regulating cell proliferation and migration and B cell differentiation.**

**(A)** Univariate analysis of demographic and clinical parameters and the identified gene signature for overall survival in over 65-year-old DLBCL patients. **(B)** Multivariate analysis of the identified gene signature and each clinical parameter as in (A). HR = hazard ratio, CI = confidence interval, ECOG = Eastern Cooperative Oncology Group, EBF1<sup>low</sup>/MYO6<sup>low</sup>/CALR<sup>high</sup> = EBF1<sup>L</sup>/MYO<sup>L</sup>/CALR<sup>H</sup>, EBF1<sup>high</sup>/MYO6<sup>high</sup>/CALR<sup>low</sup> = EBF1<sup>H</sup>/MYO<sup>H</sup>/CALR<sup>L</sup>. **(C)** Functional protein association network of EBF1, MYO6 and CALR based on STRING database.

**Supplementary Figure S4. EBF1, MYO6 and CALR expression characterize lymphoid neoplasia.**

**(A)** Box plot representing the distribution of log2 (TPM+1) gene expression of EBF1, MYO6 and CALR in lymphomas (T) ( $n=47$ ) versus normal lymphoid tissues (N) ( $n=337$ ) retrieved from (GEPID) (1). p value ( $<0.01$ ) was calculated with one-way ANOVA test. **(B)** Kaplan Meier overall survival (OS) curves of DLBCL patients at any age (GSE10846) stratified by high or low EBF1, MYO6 and CALR expression levels. **(C)** Univariate analysis of demographic and clinical parameters and the identified gene signature for overall survival in under 65-year-old DLBCL patients. **(D)** Multivariate analysis of the identified gene signature and each clinical parameter as in (C).

| Responder |                     | Non-responder  |                     |
|-----------|---------------------|----------------|---------------------|
| GENE      | log <sub>2</sub> FC | GENE           | log <sub>2</sub> FC |
| THRAP3    | 2.68546             | CALR           | 1.88754             |
| MYO6      | 2.13115             | ATAD3A         | 1.56093             |
| MIS18BP1  | 2.12645             | MAGEA9         | 1.42204             |
| TOP1      | 1.98763             | GALT           | 1.34994             |
| MALAT1*   | 1.96538             | SLC19A1*       | 1.31763             |
| CCDC18    | 1.86677             | CWF19L1        | 1.30102             |
| EBF1      | 1.81487             | LA16c-83F12.6* | 1.28188             |
| EDNRA     | 1.77893             | SLC38A5        | 1.25407             |
| FYB       | 1.77116             | LOC100287497*  | 1.23663             |
| CCDC186   | 1.75240             | MAPK8IP3       | 1.23174             |
| EEA1      | 1.70943             | JUND           | 1.21595             |
| CEP290    | 1.70587             | PRKCB          | 1.21453             |
| TFPI2     | 1.69031             | PNMA6A         | 1.20682             |
| SPINK2    | 1.68987             | TRA2A          | 1.20579             |
| WASF2     | 1.68907             | MIR142         | 1.20373             |
| SMC3      | 1.67161             | CCDC42B        | 1.20085             |
| CLIP1     | 1.67049             | RFFL           | 1.19198             |
| TPR       | 1.64159             | MAST2          | 1.19130             |
| SSPN      | 1.64121             | MAZ            | 1.17289             |
| SLX4IP    | 1.63570             | LINC00491      | 1.16714             |
| WASL      | 1.63299             | FAM129C        | 1.15564             |
| FANCM     | 1.62707             | SRRM2          | 1.15540             |
| BOD1L1    | 1.61953             | LOC441124      | 1.15500             |
| FCHO2     | 1.59444             | MTA1           | 1.15143             |
| BAG4      | 1.58071             | PNPLA2         | 1.15122             |
| UBXN4     | 1.58003             | WDFY2          | 1.15053             |
| SMC1A     | 1.57081             | INO80B         | 1.14429             |
| YTHDC2    | 1.57063             | MAGEA1         | 1.14412             |
| PCM1      | 1.57007             | SOX6           | 1.14046             |
| RASEF     | 1.56196             | AP2A1          | 1.13672             |

**Supplementary Table 1. Top30 up-regulated genes (log<sub>2</sub> fold change, log<sub>2</sub> FC) in ≥ 65-year-old DLBCL patients resistant to R-CHOP therapy in GSE10846 dataset. p-value≤0.001.**

\*These genes have not been considered for further analysis due to the unavailability of droplet digital PCR probes or because being long non-coding RNAs.

| Responder                    |         |              | Non-responder                  |         |              |
|------------------------------|---------|--------------|--------------------------------|---------|--------------|
| Signature                    | p-value | n. molecules | Signature                      | p-value | n. molecules |
| Head and neck neoplasia      | 2.68e-8 | 27           | Head and neck neoplasia        | 5.68e-6 | 22           |
| Hematologic cancer           | 1.07e-5 | 16           | Expression of RNA              | 3.00e-3 | 8            |
| Tumorigenesis of lymphocytes | 5.80e-4 | 11           | Transcription of RNA           | 3.01e-3 | 7            |
| B cell cancer                | 9.02e-4 | 9            | Proliferation of B lymphocytes | 4.75e-3 | 3            |

**Supplementary Table 2.** Signatures associated with overexpressed genes shown in Supplementary Table 1.

|                 | Responder                       | Non-responder |                              |         |
|-----------------|---------------------------------|---------------|------------------------------|---------|
| <i>GENE</i>     | copies/μl ( <i>GENE/GAPDH</i> ) |               | FC (Responder/Non-responder) | p-value |
| <i>MYO6</i>     | 0.07905                         | 0.00983       | 8.04259                      | 0.00659 |
| <i>EBF1</i>     | 0.46081                         | 0.19387       | 2.37685                      | 0.02191 |
| <i>CCDC186</i>  | 0.03814                         | 0.02332       | 1.63571                      | 0.12342 |
| <i>THRAP3</i>   | 1.02953                         | 0.77228       | 1.33310                      | 0.22693 |
| <i>FYB</i>      | 1.64093                         | 1.49881       | 1.09482                      | 0.36798 |
| <i>CCDC18</i>   | 0.28333                         | 0.27741       | 1.02136                      | 0.48612 |
| <i>EDNRA</i>    | 0.32588                         | 0.30521       | 1.06772                      | 0.46501 |
| <i>MIS18BP1</i> | 0.19527                         | 0.19673       | 0.99255                      | 0.49382 |
| <i>TOP1</i>     | 0.00392                         | 0.01079       | 0.36323                      | 0.14619 |

**Supplementary Table 3.** Differentially expressed genes in a cohort of over 65-year-old patients resistant to R-CHOP.

|                  | Responder                       | Non-responder |                              |         |
|------------------|---------------------------------|---------------|------------------------------|---------|
| <i>GENE</i>      | copies/μl ( <i>GENE/GAPDH</i> ) |               | FC (Non-responder/Responder) | p-value |
| <i>CALR</i>      | 0.10201                         | 0.13929       | 1.36543                      | 0.13600 |
| <i>ATAD3A</i>    | 0.04650                         | 0.04039       | 0.86861                      | 0.37595 |
| <i>GALT</i>      | 0.07182                         | 0.05945       | 0.82774                      | 0.41806 |
| <i>CWF19L1</i>   | 0.02063                         | 0.01842       | 0.89292                      | 0.44417 |
| <i>MAPK18IP3</i> | 0.02672                         | 0.02381       | 0.89109                      | 0.35010 |
| <i>SLC38A5</i>   | 0.28326                         | 0.10637       | 0.37553                      | 0.08083 |
| <i>MAGEA9</i>    | 1.10777                         | 0.01325       | 0.01196                      | 0.01623 |

**Supplementary Table 4.** Differentially expressed genes in a cohort of over 65-year-old patients resistant to R-CHOP

## References

1. Tang Z, Li C, Kang B, Gao G, Li C, Zhang Z. GEPIA: a web server for cancer and normal gene expression profiling and interactive analyses. *Nucleic Acids Res.* 2017;45(W1):W98-W102.
